# Supplementary material
Source: publisher figshare collection journal article supplement (https://acs.figshare.com/ndownloader/files/11270477)
Supplement: Supplementary file 1 [file 11270477]

## *Supporting Information*

# A Simple Perylene Derivative as a Solution–Processable Cathode Interlayer for Perovskite Solar Cells with Enhanced Efficiency and Stability

*Chen Wang,<sup>†,‡</sup> Ping Liu,<sup>†,‡</sup> Huanxin Ju,<sup>§</sup> Quan Yuan,<sup>†,‡</sup> Dongwei Han,<sup>†,‡</sup> Yu Wang,<sup>†,‡</sup> Dong–Ying Zhou,<sup>\*,†,‡</sup> Lai Feng,<sup>\*,†,‡</sup>*

<sup>†</sup>Soochow Institute for Energy and Materials InnovationS (SIEMIS), College of Physics, Optoelectronics and Energy & Collaborative Innovation Center of Suzhou Nano Science and Technology and <sup>‡</sup>Jiangsu Key Laboratory of Advanced Carbon Materials and Wearable Energy Technologies, Soochow University, Suzhou 215006, China

<sup>§</sup>National Synchrotron Radiation Laboratory, University of Science and Technology of China, Hefei, Anhui 230029, China

\* Email Addresses: dyzhou@suda.edu.cn; fenglai@suda.edu.cn

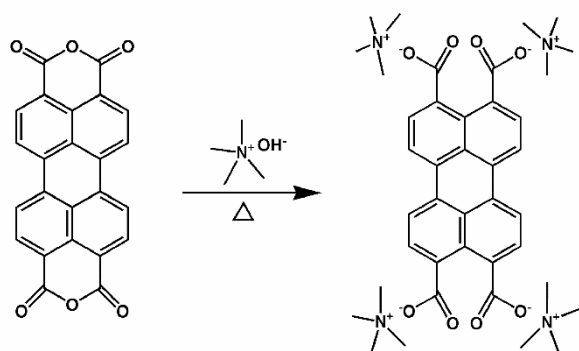

**Scheme S1.** Synthetic route of TMA-PTC.

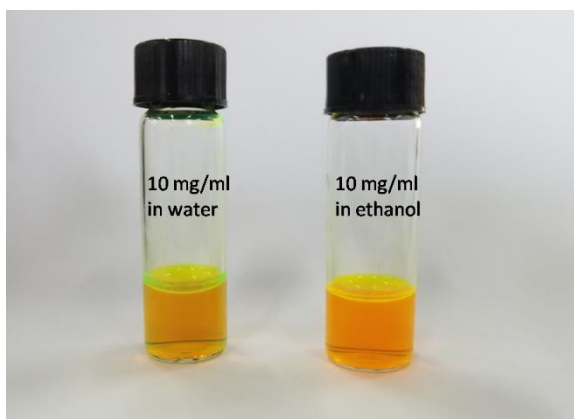

**Figure S1.** Photos of TMA-PTC water and ethanol solutions at the concentration of 10 mg/ml, respectively.

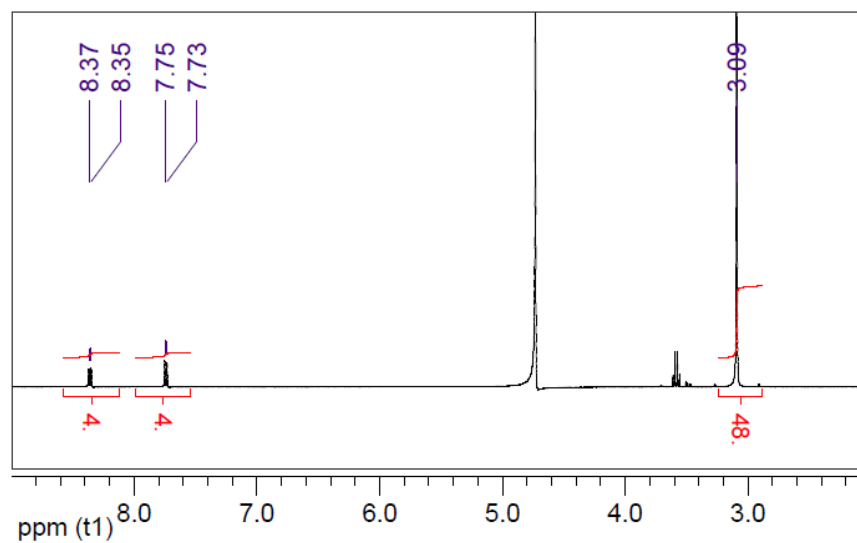

**Figure S2.** <sup>1</sup>H NMR spectrum of TMA-PTC.

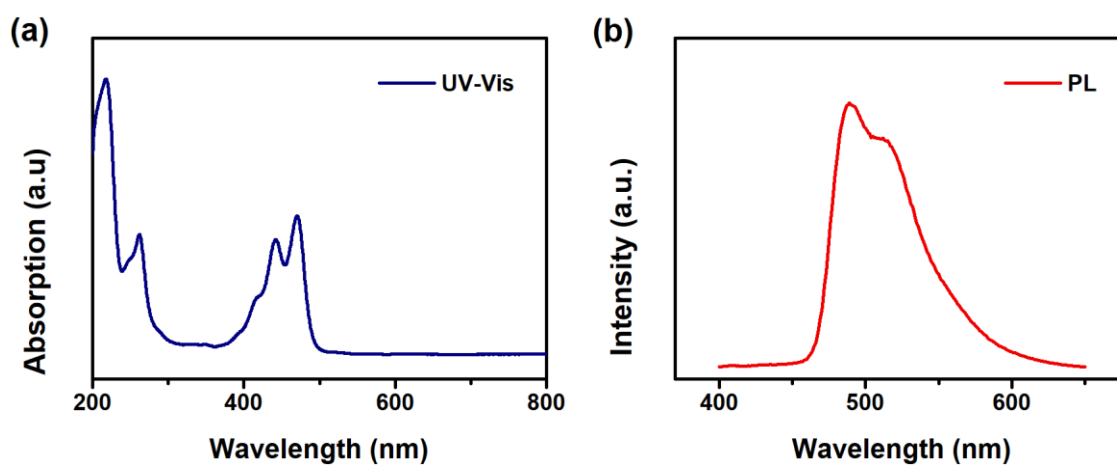

**Figure S3.** (a) UV-Vis absorption and (b) PL spectra of TMA-PTC in ethanol (0.5 mg/mL).

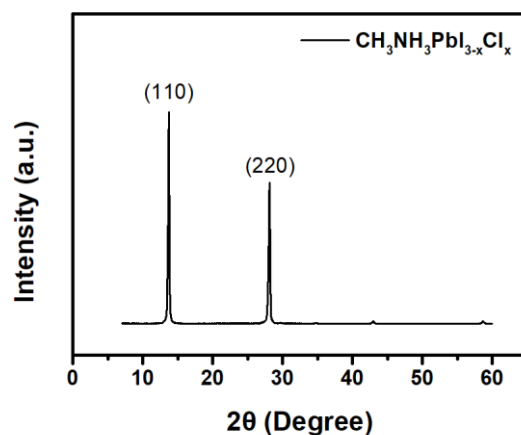

**Figure S4.** XRD patterns of the perovskite film prepared from the mixture of  $\text{PbI}_2:\text{PbCl}_2:\text{CH}_3\text{NH}_3\text{I}$  and annealed at 80 °C for 2 hours.

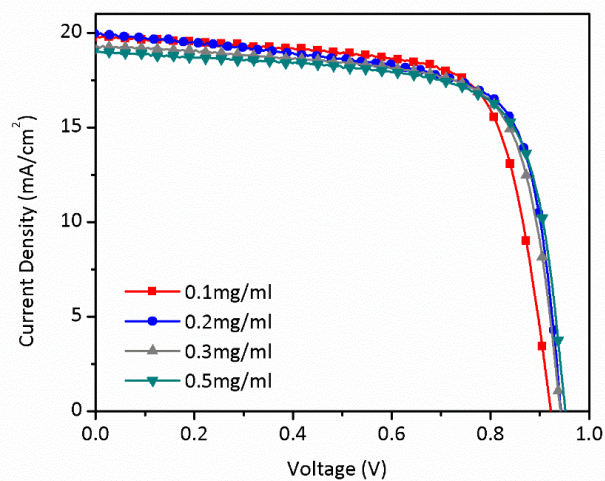

**Figure S5.**  $J$ - $V$  curves of PeSCs with TMA-PTC CIL prepared from the solutions with varied concentrations.

**Table S1.** Photovoltaic parameters of PeSCs with TMA-PTC CIL with varied concentrations.

| concentration | $V_{oc}$ (V) | FF (%) | $J_{sc}$ (mA/cm <sup>2</sup> ) | PCE (%) |
|---------------|--------------|--------|--------------------------------|---------|
| 0.1mg/ml      | 0.925        | 71.74  | 19.82                          | 13.14   |
| 0.2mg/ml      | 0.940        | 70.94  | 19.99                          | 13.33   |
| 0.3mg/ml      | 0.944        | 72.22  | 19.33                          | 13.18   |
| 0.5mg/ml      | 0.951        | 72.77  | 19.01                          | 13.15   |

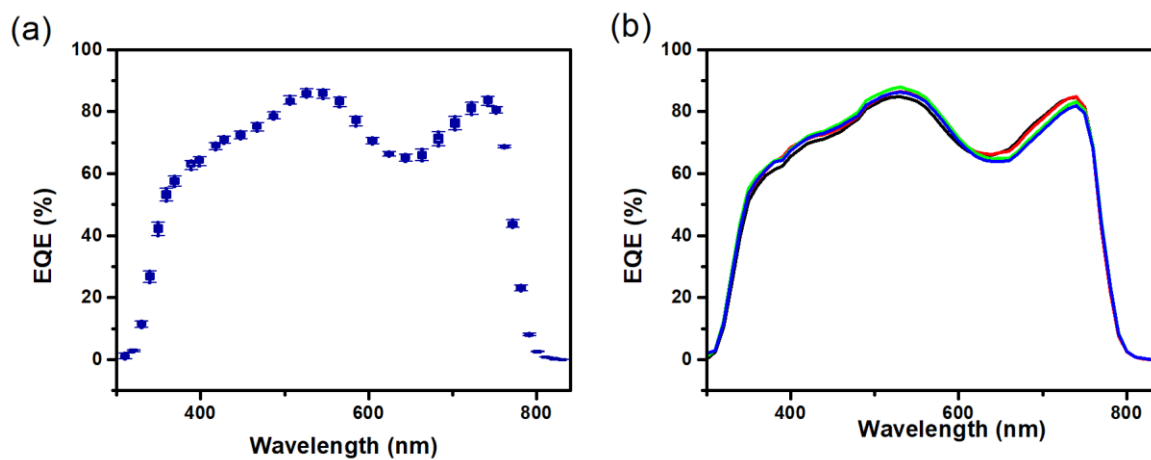

**Figure S6.** (a) EQE spectrum of a typical perovskite solar cells with TMA-PTC CIL, and (b) EQE spectra of four individual perovskite solar cells with TMA-PTC CIL.

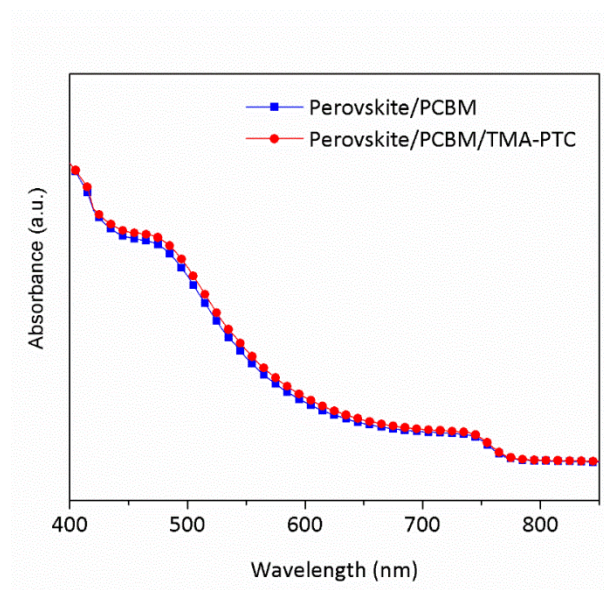

**Figure S7.** UV-Vis absorption spectra of perovskite films coated with PC<sub>61</sub>BM and PC<sub>61</sub>BM/TMA-PTC, respectively.

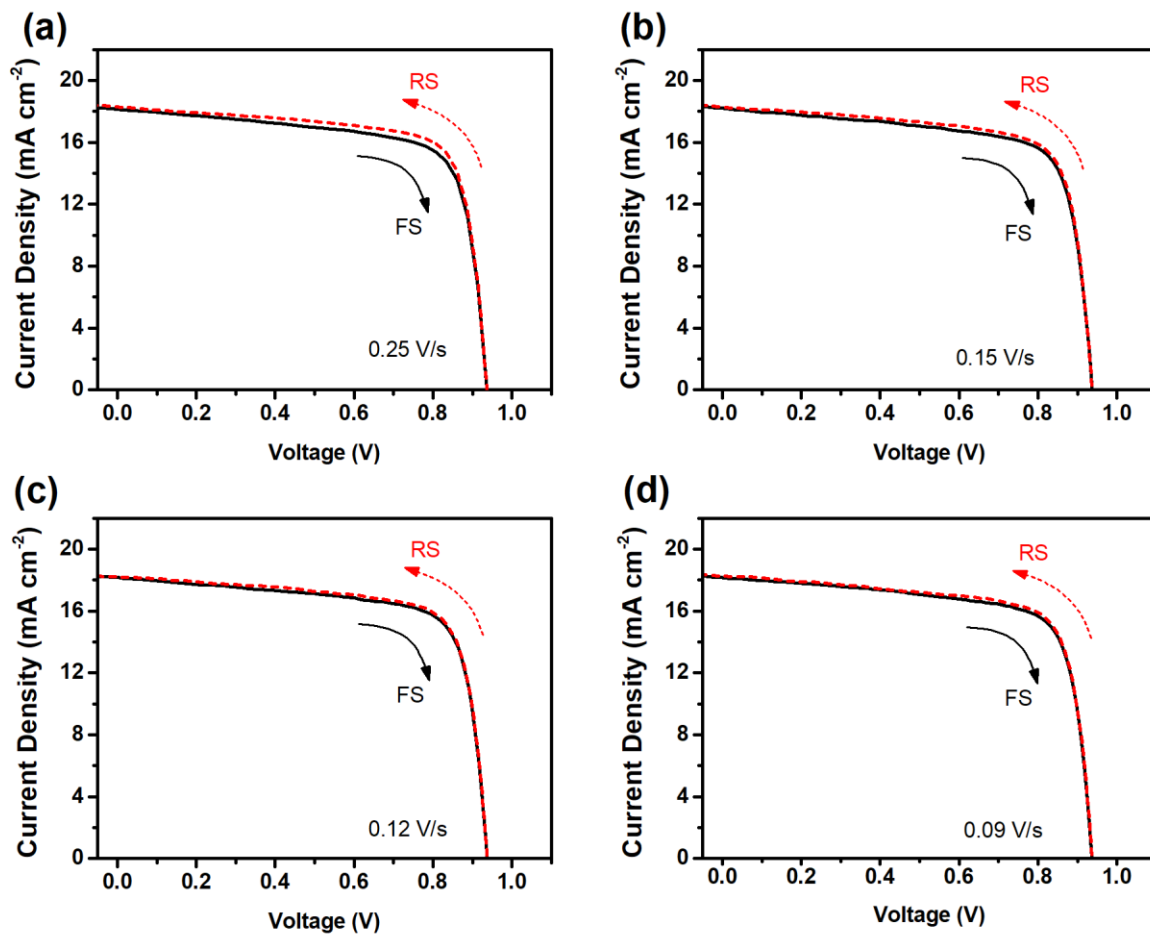

**Figure S8.**  $J$ – $V$  curves of PeSCs (not the best performance device) with TMA–PTC as the CIL under both forward (FS) and reverse (RS) scans with varied scan speeds (i.e., (a) 0.25 V/s, (b) 0.15 V/s, (c) 0.12 V/s, (d) 0.09 V/s) in 1 sun illumination.

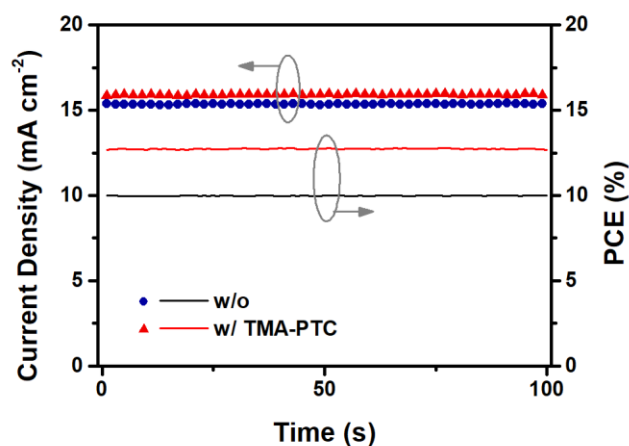

**Figure S9.** Steady-state measurement of  $J_{SC}$  and PCE for the PeSCs (not the best performance devices) with and without TMA-PTC CIL at the corresponding maximum power output points (i.e., at 0.80 V and 0.65 V, respectively).

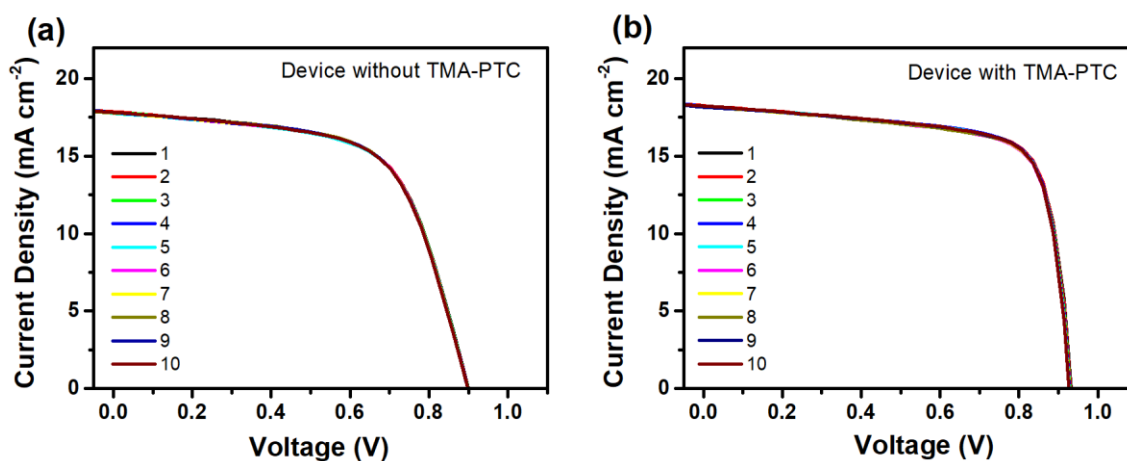

**Figure S10.**  $J$ - $V$  curves of PeSCs (not the best performance devices) (a) with and (b) without TMA-PTC CIL measured at repeated scans of 10 times in 1 sun illumination.



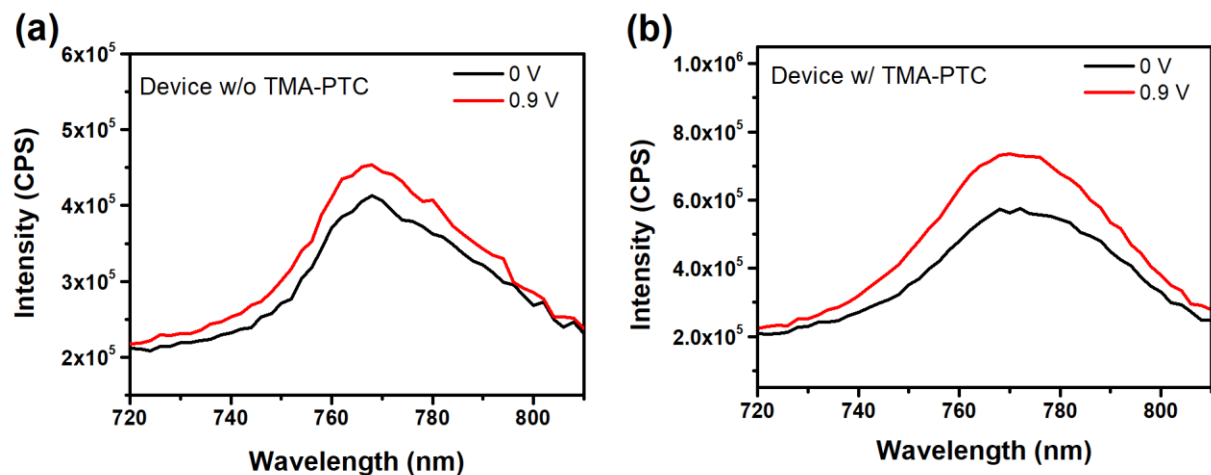

**Figure S11.** (a) PL of the device without TMA-PTC at 0 V and 0.9 V; (b) PL of the device with TMA-PTC at 0 V and 0.9 V.

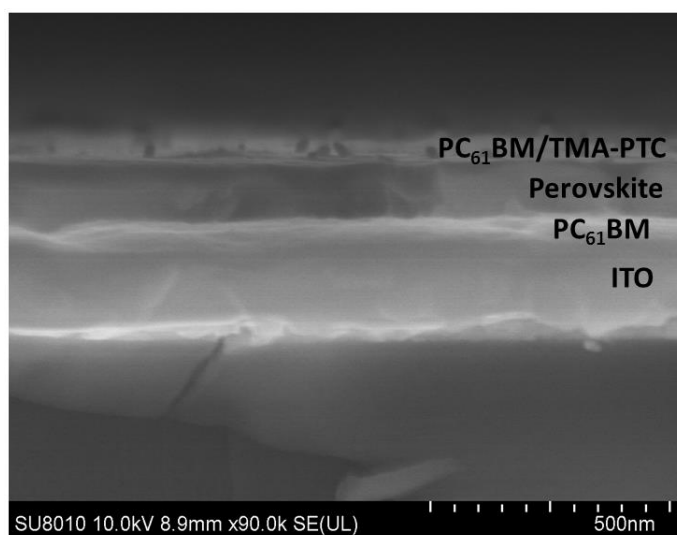

**Figure S12.** Cross sectional SEM image of ITO/PC<sub>61</sub>BM/Perovskite/PC<sub>61</sub>BM/TMA-PTC stacked films in electron-only device.

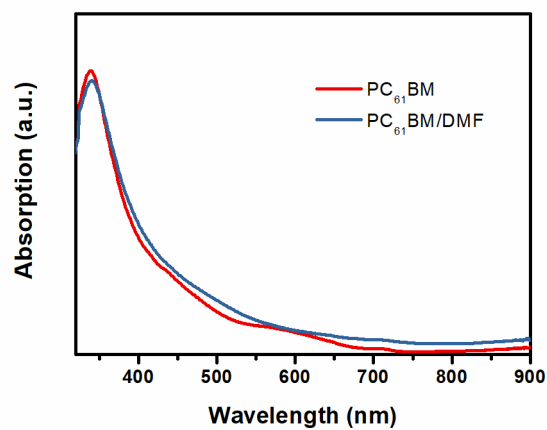

**Figure S13.** Absorption spectra of PC<sub>61</sub>BM films before and after spin-coated with DMF solvent.

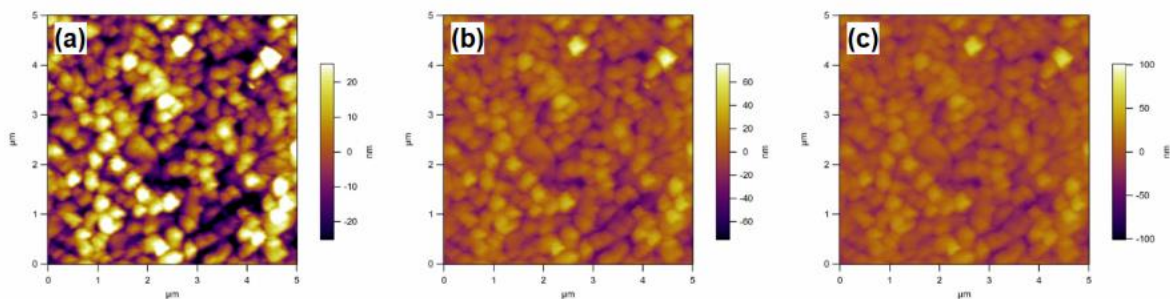

**Figure S14.** AFM images of pristine perovskite films with different color contrast: (a) 50 nm; (b) 100 nm; (c) 200 nm.

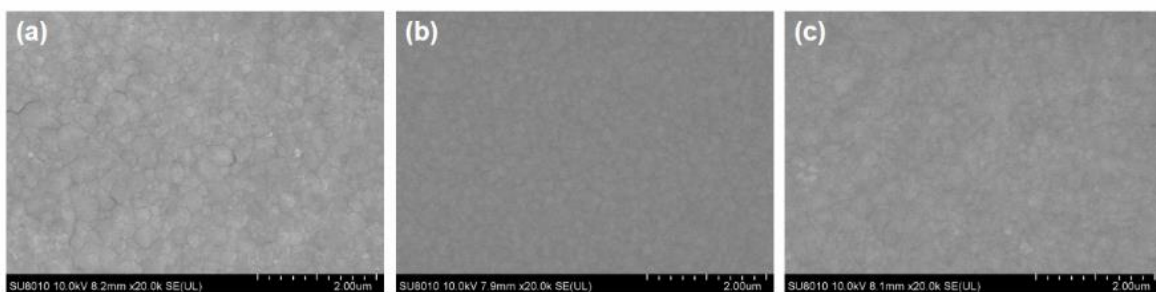

**Figure S15.** Top-view SEM images of (a) pristine perovskite, (b) perovskite/PC<sub>61</sub>BM and (c) perovskite/PC<sub>61</sub>BM/TMA-PTC layers.

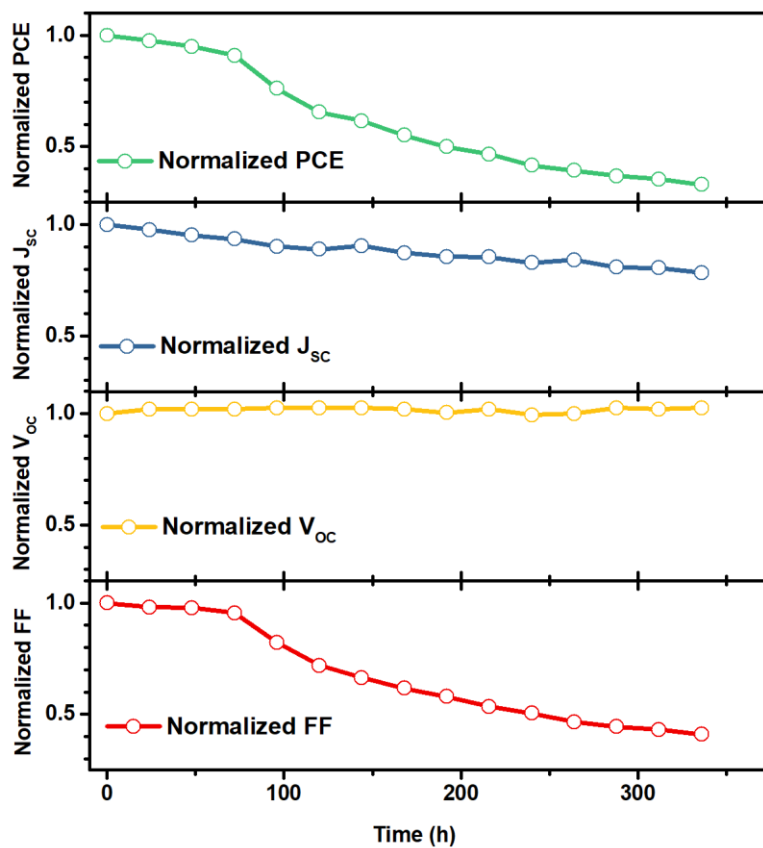

**Figure S16.** Photovoltaic parameters of perovskite solar cell without TMA-PTC decayed as a function of exposition time in the air.

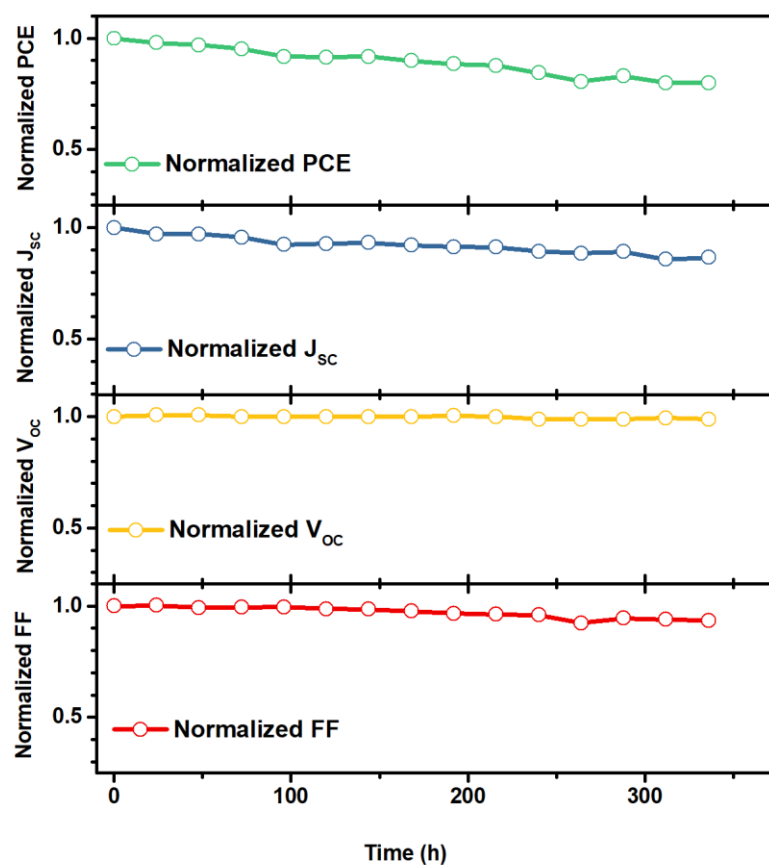

**Figure S17.** Photovoltaic parameters of perovskite solar cell with TMA-PTC decayed as a function of exposition time in the air.

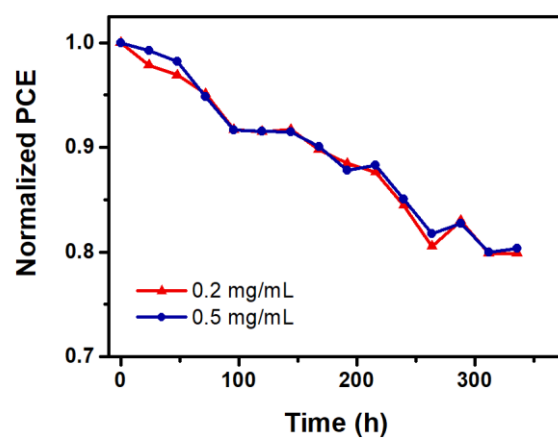

**Figure S18.** PCE decay of PeSCs treated with 0.2 and 0.5 mg/mL TMA-PTC decayed as a function of exposition time in the air.

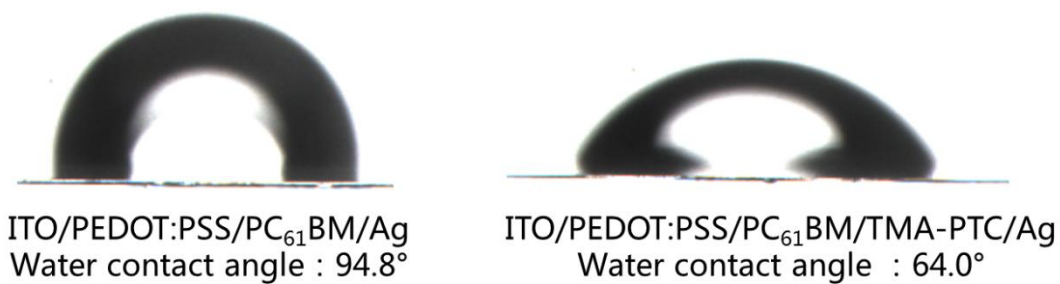

**Figure S19.** Measured water contact angle for the PC<sub>61</sub>BM films with and without TMA-PTC CIL.

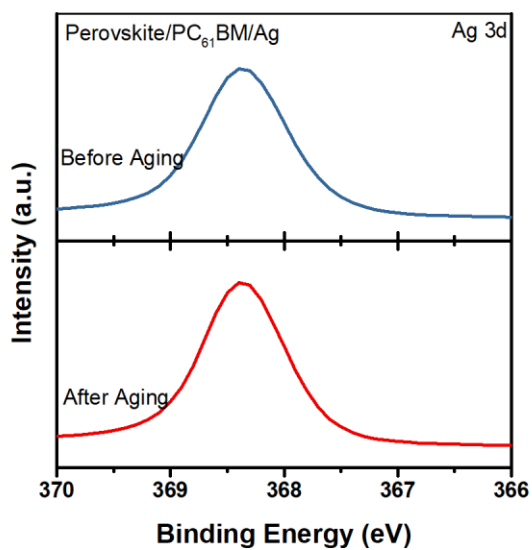

**Figure S20.** XPS spectra of Ag 3d obtained from the perovskite solar cell without TMA-PTC CIL before and after aging.

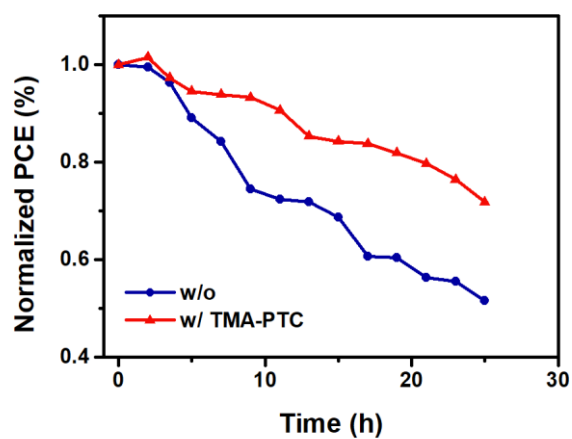

**Figure S21.** PCE decay of unencapsulated PeSCs with or without TMA-PTC as a function of exposure time in the air with a high relative humidity (>60%).

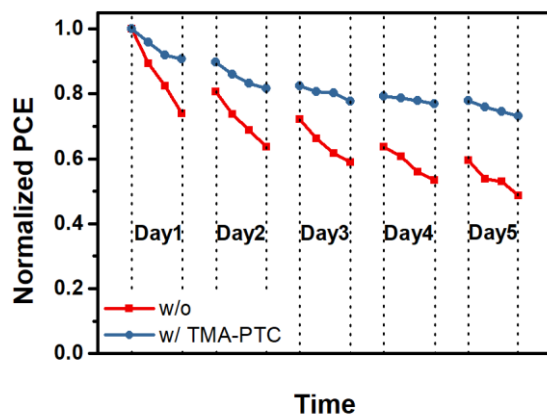

**Figure S22.** PCE decay of perovskite solar cell with and without TMA-PTC under the condition of light (1 sun illumination)-dark cyclings as a function of storage time.

### Space charge limited current (SCLC) measurements

The electron-only devices were fabricated with a configuration of ITO/PC<sub>61</sub>BM/Perovskite/PC<sub>61</sub>BM/TMA-PTC/Ag. The thickness of perovskite layer is ca. 310 nm, while the thickness of PC<sub>61</sub>BM layer is ca. 40 nm. The SCLC can be written as  $J_{SCLC} = 9\epsilon_0\epsilon_r\mu_e(V-V_{BI})^2/(8L^3)$ : where  $J$  is current density,  $\epsilon_r$  is dielectric constant of the perovskite materials (normally a value of 28.8 is used),<sup>1</sup>  $\epsilon_0$  ( $8.8541878176 \times 10^{-12}$  F/m) is the permittivity of vacuum,  $\mu_e$  is electron carrier mobility,  $L$  is film thickness,  $V = V_{appt} - V_{bi}$ ,  $V_{appt}$  is the applied potential, and  $V_{bi}$  is the built-in potential resulting from work function difference between two electrodes (in this device,  $V_{bi} = 0$  V). To calculate the  $\mu_e$  value, the log  $J$ - $V$  line obtained in dark was fitted using a function of  $y = a + 2x$  and electron mobility ( $\mu_e$ ) was calculated from the y-intercept of the fitting line.

### Reference.

[1] Yang, D.; Yang, R.; Ren, X.; Zhu, X.; Yang, Z.; Li, C.; Liu, S. Hysteresis-Suppressed High-Efficiency Flexible Perovskite Solar Cells Using Solid-State Ionic-Liquids for Effective Electron Transport. *Adv. Mater.* **2016**, 28, 5206–5213.
